1 **Saliva is a promising alternative specimen for the detection of SARS-CoV-2 in children and**  
2 **adults**

3

4 Rebecca Yee, PhD<sup>1\*</sup>, Thao Truong, PhD<sup>1\*</sup>, Pia S. Pannaraj, MD, MPH<sup>2, 3</sup>, Natalie Eubanks<sup>1</sup>,  
5 Emily Gai<sup>1</sup>, Jaycee Jumarang, MD<sup>2</sup>, Lauren Turner, MS<sup>2</sup>, Ariana Peralta<sup>2</sup>, Yesun Lee, PhD<sup>2</sup>,  
6 Jennifer Dien Bard, PhD<sup>1, 3, #</sup>

7 <sup>1</sup>Department of Pathology and Laboratory Medicine, Children's Hospital Los Angeles, Los  
8 Angeles, CA

9 <sup>2</sup>Department of Pediatrics, Division of Infectious Diseases, Children's Hospital Los Angeles, Los  
10 Angeles, CA

11 <sup>3</sup>Keck School of Medicine, University of Southern California, Los Angeles, CA

12 \*Authors contributed equally, order was decided based on seniority

13

14

15 **#Corresponding Author:** Jennifer Dien Bard, PhD, D(ABMM)

16 Email: [jdienbard@chla.usc.edu](mailto:jdienbard@chla.usc.edu)

17 **Running title:** Saliva for detecting SARS-CoV-2

18 **Keywords:** SARS-CoV-2, COVID-19, pediatric, saliva, nasopharyngeal swab

19 **Summary:** Saliva is an acceptable alternative specimen compared to nasopharyngeal swabs for  
20 detection of SARS-CoV-2. Specifically, saliva demonstrated comparable performance to  
21 nasopharyngeal swabs in symptomatic and asymptomatic pediatric patients and in symptomatic  
22 adults.

23

24 **Abstract**

25 Testing efforts for SARS-CoV-2 have been burdened by the scarcity of testing materials and  
26 personal protective equipment for healthcare workers. The simple and painless process of saliva  
27 collection allows for widespread testing, but enthusiasm is hampered by variable performance  
28 compared to nasopharyngeal swab (NPS) samples. We prospectively collected paired NPS and  
29 saliva samples from a total of 300 unique adult and pediatric patients. SARS-CoV-2 RNA was  
30 detected in 32.2% (97/300) of the individuals using the TaqPath COVID-19 Combo Kit (Thermo  
31 Fisher). Performance of saliva and NPS were compared against the total number of positives  
32 regardless of specimen type. The overall concordance for saliva and NPS was 91.0% (273/300)  
33 and 94.7% (284/300), respectively. The positive percent agreement (PPA) for saliva and NPS  
34 was 81.4% (79/97) and 89.7% (87/97), respectively. Saliva detected 10 positive cases that were  
35 negative by NPS. In symptomatic and asymptomatic pediatric patients not previously diagnosed  
36 with COVID-19, the performances of saliva and NPS were comparable (PPA: 82.4% vs 85.3%).  
37 The overall PPA for adults were 83.3% and 90.7% for saliva and NPS, respectively, with saliva  
38 detecting 4 cases less than NPS. However, saliva performance in symptomatic adults was  
39 identical to NPS (PPA of 93.8%). With lower cost and self-collection capabilities, saliva can be  
40 an appropriate alternative sample choice to NPS for detection of SARS-CoV-2 in children and  
41 adults.

42

43

44

45

46

## 47 **Introduction**

48 Accurate and timely molecular testing for SARS-CoV-2, the causative agent of the  
49 ongoing coronavirus disease 2019 (COVID-19) pandemic, has been crucial for informing patient  
50 management, public health decision making, contact tracing, and infection control. The  
51 Infectious Diseases Society of America (IDSA) guidelines recommend testing for SARS-CoV-2  
52 by reverse-transcriptase polymerase chain reaction (RT-PCR) on specimen samples which  
53 includes nasopharyngeal swabs (NPS), mid-turbinate swabs, or nasal swabs rather than  
54 oropharyngeal swabs (OPS) or saliva alone (1). However, testing efforts have been hampered by  
55 supply chain shortages due to an unprecedented demand for testing materials such as swabs,  
56 universal transport media, and personal protective equipment for healthcare workers (2). The  
57 simplicity of saliva collection has certainly increased its interest as an alternative specimen for  
58 detection of SARS-CoV-2.

59 Compared to NP specimen collection, saliva is less invasive, circumvents the need for  
60 swabs, and requires minimal supervision with the option for self-collection. Previous studies  
61 have indicated that saliva is a promising specimen for detection of other respiratory viruses by  
62 RT-PCR, including influenza and common non-SARS human coronaviruses (3-5). To-date, the  
63 U.S. Food and Drug Administration has issued several emergency use authorizations for  
64 laboratory-developed diagnostic tests using saliva. More recent studies have shown use of saliva  
65 has moderate-to-high sensitivity and specificity when compared to NP swabs for detection of  
66 SARS-CoV-2 (6-12). These studies vary widely in sample collection method and testing  
67 platforms, and more data is needed to standardize best collection and processing practices.

68 There is tremendous motivation to pursue saliva collection in children, not only because  
69 of the simplicity in specimen collection but to also avoid the unnecessary discomfort during NPS

70 collection. There is also huge interest in saliva as a primary specimen type to detected SARS-  
71 CoV-2 during the school year. Hence, it is important to understand the dynamics of viral  
72 detection in children, which has implications for their contribution to transmission of SARS-  
73 CoV-2. Unfortunately, data on the use of saliva to detect SARS-CoV-2 in pediatric patients is  
74 sparse. The few reports available on the performance of saliva specimens in children showed  
75 poor detection of SARS-CoV-2 with sensitivities of 53-73% albeit such studies suffer from small  
76 sample sizes (13-15). In this study, we evaluated and compared prospectively collected paired  
77 saliva and NP swabs from both pediatric and adult patients for detection of SARS-CoV-2. We  
78 also compare the differences in viral load in asymptomatic and symptomatic COVID-19 patients.

## 79 **Methods**

### 80 **Study Design**

81 A total of 300 unique patients (inpatients, outpatients and household members of  
82 diagnosed COVID-19 patients) were enrolled in this study between June 8 to August 28, 2020.  
83 Demographic data including age, gender, and symptoms were collected. Participants were asked  
84 if they had previously tested positive for COVID-19. Paired samples were collected from  
85 individuals with unknown COVID-19 status as well as from patients previously positive for  
86 SARS-CoV-2. Both symptomatic and asymptomatic patients were enrolled in the study. Study  
87 design conducted at Children's Hospital Los Angeles was approved by the Institutional Review  
88 Board under IRB #CHLA-20-00124 and CHLA-18-00098.

### 89 **Sample collection**

90 At least 3 mL of saliva was self-collected under the observation of a healthcare worker  
91 who subsequently collected a NP swab sample for parallel testing. Saliva was collected in a  
92 sterile cup and NP swabs were immediately placed in viral transport medium (Becton Dickenson,

93 Franklin Lakes, NJ, USA). Samples were either sent to the clinical laboratory within 1 hour from  
94 collection or stored at 4°C and sent to the clinical laboratory within 4 hours from collection.  
95 Samples were stored at 4°C and tested within 48 hours from collection or stored at -80°C prior to  
96 testing.

#### 97 **qRT-PCR assay for SARS-CoV-2 RNA**

98 Paired nasopharyngeal swabs and saliva were sent to the Clinical Virology Laboratory at  
99 Children's Hospital Los Angeles. Total nucleic acid was extracted from 250 µL samples using  
100 the Thermo Fisher KingFisher Flex specimen processing system with the Applied Biosystems  
101 MagMAX Viral/Pathogen Nucleic Acid Isolation Kit (Thermo Fisher, Waltham, MA) and eluted  
102 to 50 µL of total nucleic acid. Real-time reverse transcription polymerase chain reaction (RT-  
103 PCR) was performed using the TaqPath COVID-19 Combo Kit (Thermo Fisher). A positive  
104 result for SARS-CoV-2 detection was determined by amplification of at least one of the three  
105 genes targeted (N gene, S gene or ORF1ab gene) using a cut-off of Ct value <40. A valid  
106 negative result for SARS-CoV-2 detection was determined by amplification of MS2 internal  
107 control using a cut-off of Ct value <32.

108

#### 109 **Data and Statistical analysis**

110 A composite gold standard approach was used to determine a true positive case. Any  
111 positive detected from either NPS or saliva was considered a true positive and positive percent  
112 agreement (PPA) and negative percent agreement (NPA) was calculated based on this. Statistical  
113 analyses comparing different Ct values and days between onset of symptoms and test date were  
114 performed using a Mann-Whitney test.

## 115 **Results**

116           During a 11-week period (June 8 to August 28, 2020), SARS-CoV-2 RNA was detected  
117 in a total of 97 out of 300 individuals, of which 43 (44.3%) were < 19 years of age. The median  
118 age was 37.5 years old (range 19-58) and 12 years old (range 4-18) in our adult and pediatric  
119 COVID-19 positive cohorts, respectively. A female predominance was noted (61/97, 62.9%). Of  
120 the 97 COVID-19 positive patients, 55 (56.7 %) were symptomatic at the time of collection with  
121 a median of 10 days between symptom onset and time of collection. Twenty-seven (27.8%)  
122 patients were known to be positive for SARS-CoV-2 prior to enrollment. Since individuals in  
123 entire households were enrolled, it was not surprising that an overwhelming proportion of our  
124 cohort (73/97, 75.3%) reported exposure to a COVID-19 positive individual.

125           The overall concordance of saliva and NPS was 91.0% (273/300) and 94.7% (284/300),  
126 respectively. When analyzing all 97 positive patients, SARS-CoV-2 RNA were detected from  
127 both NPS and saliva in 69 patients, from saliva only in 10 patients and NPS only in 18 patients.  
128 The overall PPA for saliva and NPS was 81.4% (79/97) and 89.7% (87/97), respectively, when  
129 compared to a total number of positive cases identified by RT-PCR (Table 1). The NPA was  
130 100% for both specimen types.

131           Focusing on pediatric patients only, the overall PPA were 79.1% for saliva and 88.4% for  
132 NPS collected. Performance of saliva (PPA: 82.4%) and NPS (PPA: 85.3%) were comparable  
133 when only first time positive pediatric patients were analyzed for both symptomatic and  
134 asymptomatic patients. Specifically, testing using saliva detected the same number of COVID-19  
135 cases as NPS (both at 78.6%) in the asymptomatic pediatric cohort and only missed one positive  
136 case (85% vs 90%) in the symptomatic cohort (Table 2). The performance of saliva remained  
137 high in both young and older children. In children ages 4-10 years, saliva and NPS achieved PPA

138 of 83.3%. Additionally, saliva was able to capture all 6/6 (100%) symptomatic patients in this  
139 age group as opposed to the 5/6 (83.3%) for NPS. In older patients between 11-18 years old, one  
140 positive case was missed by saliva (PPA: 81.8% vs 86.4%) but the performance was superior  
141 when testing only asymptomatic patients (PPA: 87.5% vs 75.0%) with detection of an additional  
142 case (Table 2).

143 In adult patients, the overall PPA were 83.3% and 90.7% for saliva and NPS,  
144 respectively. In contrast to the pediatric data, saliva performed better in symptomatic patients  
145 with identical PPA to NPS at 93.8% but poorly in asymptomatic adults (PPA: 68.2% vs 86.4%).  
146 Findings were comparable even when only first time positive patients were analyzed. (Table 1-  
147 2).

148 The average differences in Ct values between saliva and NPS samples were not  
149 statistically different (Ct: 28.7 versus 29.1) (Figure 1A-B). Based on linear regression analysis  
150 where Ct values of saliva (Y-axis) are plotted against the Ct values of NPS (X-axis) from the  
151 paired sample, the equation of  $y=0.9994x$  suggests that Ct values from both sample types are  
152 approximately equivalent to one another (Figure 1C). In addition, the Ct values of both saliva  
153 and NPS samples remain comparable regardless of age and disease status (symptomatic vs  
154 asymptomatic) (Figure 2).

155 Importantly, SARS-CoV-2 RNA were detected in 28 (28.9%) patients in only one sample  
156 type (10 saliva; 18 NPS). Most of these patients were older than 10 years (25/28, 89.3%)  
157 (Supplementary Table 1). Saliva-only positive patients were tested ranging from 3 to 43 days  
158 post-symptom onset compared to the 7 to 31 day post-symptom onset in NPS-only positive  
159 patients. The overall Ct values between saliva-only and NPS-only positives were comparable (Ct

160 of 32.4 vs 32.5) with 88.8% (NPS-positive only) and 80% (saliva-positive only) of the samples  
161 having a Ct of over 30 (Figure 3).

162 The average Ct values derived from cases detected by both saliva and NPS was lower  
163 than when only one sample type was positive (Ct 28.9 vs Ct 32.4,  $p < 0.001$ ). Symptomatic  
164 patients were more likely to have SARS-CoV-2 RNA detected from both sample types  
165 (OR=3.37,  $p = 0.01$ ).

## 166 **Discussion**

167 Testing saliva specimens can circumvent the shortage of collection supplies and may be a  
168 sufficient noninvasive and more cost-effective alternative for SARS-CoV-2 testing (4). The  
169 sensitivity of saliva for detection of SARS-CoV-2 has been shown to be less than NPS in other  
170 studies, ranging from 72% to 86% (16, 17). We demonstrated an overall PPA of 81.4% in saliva  
171 versus 89.7% in NPS in our entire cohort. Comparable performance of saliva to NPS was shown  
172 in children who were previously unknown positive patients (both symptomatic and  
173 asymptomatic patients) and also in symptomatic adults only. To our knowledge, this is the first  
174 and largest study demonstrating support for utilization of saliva in the pediatric age group and  
175 comparison of performance of saliva between pediatric and adult cohorts.

176 It is important to note that testing of saliva caught 10 additional COVID-19 cases that  
177 were negative by NPS. Our findings are consistent with results from other studies demonstrating  
178 how saliva specimens can identify otherwise missed cases of not only COVID-19, but also  
179 influenza and RSV (4, 6, 17). In this study, of the 18 samples that were detected by NPS only, 7  
180 (38.9%) were from asymptomatic adults, a subpopulation that performed poorly with detection  
181 of SARS-CoV-2 in saliva. Additionally, over 80% of NPS-positive only patients exhibited Ct  
182 values past 30.0, suggesting that false negatives are attributed to lower viral loads. Additionally,



183 our study showed that the performance of saliva is not dependent on age which is corroborated  
184 by recent studies which also reported that age had no impact on viral load and detection of  
185 SARS-CoV-2 (15, 18), including in pediatric populations.

186 While some studies argue that viral load is highest in saliva within the first week of  
187 symptom onset, others have shown that saliva can be more sensitive than NPS throughout the  
188 course of infection or sometimes produce intermittent positive results over the course of a few  
189 weeks (19). A small, longitudinal pediatric study from South Korea found SARS-CoV-2 RNA  
190 was more readily detected from saliva within the first few days of symptom onset followed by a  
191 drastic decline in viral load compared to NPS (14). In contrast, we report the detection of SARS-  
192 CoV-2 in saliva for up to 43 days compared to 32 days for NP swabs.

193 While several studies have shown that NPS yield lower Ct values than saliva in  
194 symptomatic adult patients (8, 10, 11), we report no significant difference in Ct values between  
195 saliva and NPS in either our adult or pediatric patients. Our findings corroborates with a recent  
196 study of 19 adults that reported no significant differences (7). Interestingly, a recent study  
197 demonstrated that in adult populations, performance of saliva was better than NPS in detecting  
198 SARS-CoV-2 in asymptomatic individuals, but our results suggest that saliva was a poor  
199 alternative to NPS in asymptomatic adults, missing 4 cases that were NPS positive (20).  
200 However, it must be noted that in our older children cohort (11-18 years old), saliva's  
201 performance was superior than NPS for detection in first-time positive asymptomatic individuals.  
202 The conflicting findings between studies may be due to differences in saliva collection protocol,  
203 collection device, age of patient, and also the inherent difficulties in working with a more  
204 viscous sample that may be more prone to more sampling variabilities (9, 10). Such differences  
205 in methodology may account for the variability in the performance of saliva reported in other

206 studies. A more thorough comparison and standardization of saliva collection and processing  
207 needs to be evaluated.

208         Limitations of this study include the small sample size of both children, particularly  
209 younger children, and adults from a single medical institution. Second, this study consisted of  
210 only outpatients, patients admitted to the emergency department, and family members who  
211 volunteered to enroll in the study which can bias our findings regarding the role of COVID-19  
212 exposure to specimen performance. Since viral load may or may not be correlated with clinical  
213 manifestations, further studies should be conducted in inpatient or ICU settings as the spectrum  
214 of disease ranges from asymptomatic to severely ill patients (21-23). Finally, despite a  
215 standardized protocol utilized during the collection of the saliva samples, it can be challenging  
216 for children to properly salivate into a collection device. The volume of saliva obtained may also  
217 vary among patients due to excessive bubbles and other factors despite the same amount of  
218 saliva being processed for testing.

## 219 **Conclusions**

220         Our study reveals that saliva is a reliable diagnostic specimen for the detection of SARS-  
221 CoV-2 RNA by RT-PCR, particularly in both symptomatic and asymptomatic children and  
222 symptomatic adults. Moreover, saliva was able to identify additional COVID-19 cases that were  
223 otherwise missed by NPS. With saliva collection being a more cost-effective and non-invasive  
224 approach, it offers a feasible approach for widespread testing of SARS-CoV-2 in the inpatient  
225 settings and in the community.

226

227

228 **Acknowledgments**

229 We would like to acknowledge the staff members of the Clinical Virology laboratory at  
230 Children’s Hospital Los Angeles for dedication towards SARS-CoV-2 RT-PCR testing. We  
231 would like to acknowledge Dr. Javier Mestas and Irvin Ibarra Flores for assisting with the saliva  
232 testing.

233

234 **Funding**

235 This work was funded in part by the National Institutes of Health [U01 AI144616-02S1 to  
236 P.S.P.].

237 **Conflict of Interest**

238 All authors declare no conflict of interest.

239

## 240 References

- 241 1. Hanson KE, Caliendo AM, Arias CA, Englund JA, Lee MJ, Loeb M, Patel R, El Alayli A, Kalot  
242 MA, Falck-Ytter Y, Lavergne V, Morgan RL, Murad MH, Sultan S, Bhimraj A, Mustafa RA.  
243 2020. Infectious Diseases Society of America Guidelines on the Diagnosis of COVID-19.  
244 Clin Infect Dis doi:10.1093/cid/ciaa760.
- 245 2. Ranney ML, Griffeth V, Jha AK. 2020. Critical Supply Shortages - The Need for Ventilators  
246 and Personal Protective Equipment during the Covid-19 Pandemic. N Engl J Med  
247 382:e41.
- 248 3. Sueki A, Matsuda K, Yamaguchi A, Uehara M, Sugano M, Uehara T, Honda T. 2016.  
249 Evaluation of saliva as diagnostic materials for influenza virus infection by PCR-based  
250 assays. Clin Chim Acta 453:71-4.
- 251 4. To KKW, Yip CCY, Lai CYW, Wong CKH, Ho DTY, Pang PKP, Ng ACK, Leung KH, Poon RWS,  
252 Chan KH, Cheng VCC, Hung IFN, Yuen KY. 2019. Saliva as a diagnostic specimen for  
253 testing respiratory virus by a point-of-care molecular assay: a diagnostic validity study.  
254 Clin Microbiol Infect 25:372-378.
- 255 5. Kim YG, Yun SG, Kim MY, Park K, Cho CH, Yoon SY, Nam MH, Lee CK, Cho YJ, Lim CS.  
256 2017. Comparison between Saliva and Nasopharyngeal Swab Specimens for Detection of  
257 Respiratory Viruses by Multiplex Reverse Transcription-PCR. J Clin Microbiol 55:226-233.
- 258 6. Azzi L, Carcano G, Gianfagna F, Grossi P, Gasperina DD, Genoni A, Fasano M, Sessa F,  
259 Tettamanti L, Carinci F, Maurino V, Rossi A, Tagliabue A, Baj A. 2020. Saliva is a reliable  
260 tool to detect SARS-CoV-2. J Infect 81:e45-e50.
- 261 7. Pasomsub E, Watcharananan SP, Boonyawat K, Janchompoo P, Wongtabtim G, Sukswan  
262 W, Sungkanuparph S, Phuphuakrat A. 2020. Saliva sample as a non-invasive specimen  
263 for the diagnosis of coronavirus disease 2019: a cross-sectional study. Clin Microbiol  
264 Infect doi:10.1016/j.cmi.2020.05.001.
- 265 8. Williams E, Bond K, Zhang B, Putland M, Williamson DA. 2020. Saliva as a Noninvasive  
266 Specimen for Detection of SARS-CoV-2. J Clin Microbiol 58.
- 267 9. Hanson KE, Barker AP, Hillyard DR, Gilmore N, Barrett JW, Orlandi RR, Shakir SM. 2020.  
268 Self-Collected Anterior Nasal and Saliva Specimens versus Healthcare Worker-Collected  
269 Nasopharyngeal Swabs for the Molecular Detection of SARS-CoV-2. J Clin Microbiol  
270 doi:10.1128/jcm.01824-20.
- 271 10. Landry ML, Criscuolo J, Peaper DR. 2020. Challenges in use of saliva for detection of  
272 SARS CoV-2 RNA in symptomatic outpatients. J Clin Virol 130:104567.
- 273 11. Iwasaki S, Fujisawa S, Nakakubo S, Kamada K, Yamashita Y, Fukumoto T, Sato K, Oguri S,  
274 Taki K, Senjo H, Sugita J, Hayasaka K, Konno S, Nishida M, Teshima T. 2020. Comparison  
275 of SARS-CoV-2 detection in nasopharyngeal swab and saliva. J Infect 81:e145-e147.
- 276 12. Altawalrah H, AlHuraish F, Alkandari WA, Ezzikouri S. 2020. Saliva specimens for  
277 detection of severe acute respiratory syndrome coronavirus 2 in Kuwait: A cross-  
278 sectional study. J Clin Virol 132:104652.
- 279 13. Han MS, Seong MW, Heo EY, Park JH, Kim N, Shin S, Cho SI, Park SS, Choi EH. 2020.  
280 Sequential analysis of viral load in a neonate and her mother infected with SARS-CoV-2.  
281 Clin Infect Dis doi:10.1093/cid/ciaa447.

- 282 14. Han MS, Seong MW, Kim N, Shin S, Cho SI, Park H, Kim TS, Park SS, Choi EH. 2020. Viral  
283 RNA Load in Mildly Symptomatic and Asymptomatic Children with COVID-19, Seoul,  
284 South Korea. *Emerg Infect Dis* 26:2497-2499.
- 285 15. Chong CY, Kam KQ, Li J, Maiwald M, Loo LH, Nadua KD, Tan NWH, Yung CF, Thoon KC.  
286 2020. Saliva is not a useful diagnostic specimen in children with Coronavirus Disease  
287 2019. *Clin Infect Dis* doi:10.1093/cid/ciaa1376.
- 288 16. Zhu J, Guo J, Xu Y, Chen X. 2020. Viral dynamics of SARS-CoV-2 in saliva from infected  
289 patients. *J Infect* 81:e48-e50.
- 290 17. Jamal AJ, Mozafarihashjin M, Coomes E, Powis J, Li AX, Paterson A, Anceva-Sami S,  
291 Barati S, Crowl G, Faheem A, Farooqi L, Khan S, Prost K, Poutanen S, Taylor M, Yip L,  
292 Zhong XZ, McGeer AJ, Mubareka S. 2020. Sensitivity of nasopharyngeal swabs and saliva  
293 for the detection of severe acute respiratory syndrome coronavirus 2 (SARS-CoV-2). *Clin*  
294 *Infect Dis* doi:10.1093/cid/ciaa848.
- 295 18. Yonker LM, Neilan AM, Bartsch Y, Patel AB, Regan J, Arya P, Gootkind E, Park G,  
296 Hardcastle M, John AS, Appleman L, Chiu ML, Fialkowski A, Flor DDI, Lima R, Bordt EA,  
297 Yockey LJ, D'Avino P, Fischinger S, Shui JE, Lerou PH, Bonventre JV, Yu XG, Ryan ET,  
298 Bassett IV, Irimia D, Edlow AG, Alter G, Li JZ, Fasano A. 2020. Pediatric SARS-CoV-2:  
299 Clinical Presentation, Infectivity, and Immune Responses. *The Journal of Pediatrics* 0.
- 300 19. Cheuk S, Wong Y, Tse H, Siu HK, Kwong TS, Chu MY, Yau FYS, Cheung IYY, Tse CWS, Poon  
301 KC, Cheung KC, Wu TC, Chan JWM, Cheuk W, Lung DC. 2020. Posterior oropharyngeal  
302 saliva for the detection of SARS-CoV-2. *Clin Infect Dis* doi:10.1093/cid/ciaa797.
- 303 20. Yokota I, Shane PY, Okada K, Unoki Y, Yang Y, Inao T, Sakamaki K, Iwasaki S, Hayasaka K,  
304 Sugita J, Nishida M, Fujisawa S, Teshima T. 2020. Mass screening of asymptomatic  
305 persons for SARS-CoV-2 using saliva. *Clin Infect Dis* doi:10.1093/cid/ciaa1388.
- 306 21. Pujadas E, Chaudhry F, McBride R, Richter F, Zhao S, Wajnberg A, Nadkarni G, Glicksberg  
307 BS, Houldsworth J, Cordon-Cardo C. 2020. SARS-CoV-2 viral load predicts COVID-19  
308 mortality. *Lancet Respir Med* 8:e70.
- 309 22. Argyropoulos KV, Serrano A, Hu J, Black M, Feng X, Shen G, Call M, Kim MJ, Lytle A,  
310 Belovarac B, Vougiouklakis T, Lin LH, Moran U, Heguy A, Troxel A, Snuderl M, Osman I,  
311 Cotzia P, Jour G. 2020. Association of Initial Viral Load in Severe Acute Respiratory  
312 Syndrome Coronavirus 2 (SARS-CoV-2) Patients with Outcome and Symptoms. *Am J*  
313 *Pathol* 190:1881-1887.
- 314 23. He X, Lau EHY, Wu P, Deng X, Wang J, Hao X, Lau YC, Wong JY, Guan Y, Tan X, Mo X,  
315 Chen Y, Liao B, Chen W, Hu F, Zhang Q, Zhong M, Wu Y, Zhao L, Zhang F, Cowling BJ, Li F,  
316 Leung GM. 2020. Temporal dynamics in viral shedding and transmissibility of COVID-19.  
317 *Nat Med* 26:672-675.

319

320 **Table 1. Performance of Saliva and NP specimens**

|                             |        | First-time Positives | All Positives |
|-----------------------------|--------|----------------------|---------------|
| <b>All samples</b>          |        | N=70                 | N=97          |
| No. (%)                     | Saliva | 57 (81.4)            | 79 (81.4)     |
| No. (%)                     | NP     | 62 (88.6)            | 87 (89.7)     |
| <b>Pediatric (all ages)</b> |        | N=34                 | N=43          |
| No. (%)                     | Saliva | 28 (82.4)            | 34 (79.1%)    |
| No. (%)                     | NP     | 29 (85.3)            | 38 (88.4)     |
| <b>&lt; 10 years old</b>    |        | N=12                 | N=15          |
| No. (%)                     | Saliva | 10 (83.3)            | 12 (80.0)     |
| No. (%)                     | NP     | 10 (83.3)            | 13 (86.7)     |
| <b>11-18 years old</b>      |        | N=22                 | N=28          |
| No. (%)                     | Saliva | 18 (81.8)            | 22 (78.6)     |
| No. (%)                     | NP     | 19 (86.4)            | 25 (89.3)     |
| <b>Adult</b>                |        | N=36                 | N=54          |
| No. (%)                     | Saliva | 29 (80.6)            | 45 (83.3)     |
| No. (%)                     | NP     | 33 (91.7)            | 49 (90.7)     |

321

322 **Table 2. Performance of Saliva and NP specimens in Symptomatic Patients**

|                               |        | Symptomatic (%)      |               | Asymptomatic (%)     |               |
|-------------------------------|--------|----------------------|---------------|----------------------|---------------|
|                               |        | First-time Positives | All Positives | First-time Positives | All Positives |
| <b>All samples</b>            |        | N=38                 | N=55          | N=32                 | N=42          |
| No. (%)                       | Saliva | 34 (89.5)            | 49 (89.1)     | 23 (71.9)            | 30 (71.4)     |
| No. (%)                       | NP     | 36 (94.7)            | 51 (92.7)     | 26 (81.3)            | 36 (85.7)     |
| <b>All Pediatric (0-18 y)</b> |        | N=20                 | N=23          | N=14                 | N=20          |
| No. (%)                       | Saliva | 17 (85.0)            | 19 (82.6)     | 11 (78.6)            | 15 (75.0)     |
| No. (%)                       | NP     | 18 (90.0)            | 21 (91.3)     | 11 (78.6)            | 17 (85.0)     |
| <b>&lt; 10 y</b>              |        | N=6                  | N=8           | N=6                  | N=7           |
| No. (%)                       | Saliva | 6 (100)              | 7 (87.5)      | 4 (66.7)             | 5 (71.4)      |
| No. (%)                       | NP     | 5 (83.3)             | 7 (87.5)      | 5 (83.3)             | 6 (85.7)      |
| <b>11-18 y</b>                |        | N=14                 | N=15          | N=8                  | N=13          |
| No. (%)                       | Saliva | 11 (78.6)            | 12 (80.0)     | 7 (87.5)             | 10 (76.9)     |
| No. (%)                       | NP     | 13 (92.9)            | 14 (93.3)     | 6 (75.0)             | 11 (84.6)     |
| <b>Adult (&gt;18 y)</b>       |        | N=18                 | N=32          | N=18                 | N=22          |
| No. (%)                       | Saliva | 17 (94.4)            | 30 (93.8)     | 12 (66.7)            | 15 (68.2)     |
| No. (%)                       | NP     | 18 (100)             | 30 (93.8)     | 15 (83.3)            | 19 (86.4)     |

323

324 **Figure Legends**

325 **Figure 1. Concordance of Ct values from Saliva and NP swabs.** Comparison of Ct values  
326 from paired saliva and nasopharyngeal swab specimens in (A) adult and (B) pediatric patients  
327 that were positive for SARS-CoV-2. Each line represents the corresponding paired specimen. (C)  
328 Regression curve plotting Ct values from paired saliva and nasopharyngeal swab specimens that  
329 were positive for SARS-CoV-2 reveal a linear association between the Ct values obtained from  
330 the two specimen types.

331

332 **Figure 2. Comparison of Ct values from asymptomatic and symptomatic populations.** The  
333 Ct values from saliva and nasopharyngeal swab specimens collected from our SARS-CoV-2  
334 positive asymptomatic (open circle) and symptomatic (filled circle) patients in our (A) adult  
335 populations and (B) pediatric cohort.

336

337 **Figure 3. Ct values of saliva and NP swab samples in relation to days between time of**  
338 **symptom onset to time of collection for testing.** The Ct values of (A) adult and (B) pediatric  
339 patients tested positive by both nasopharyngeal swab (black solid circle) and saliva (black open  
340 circle), nasopharyngeal swab only (blue filled circle), and saliva only (blue open circle) are  
341 depicted in reference to when they were tested since symptom onset (days).

342

343 **Figure 1.**

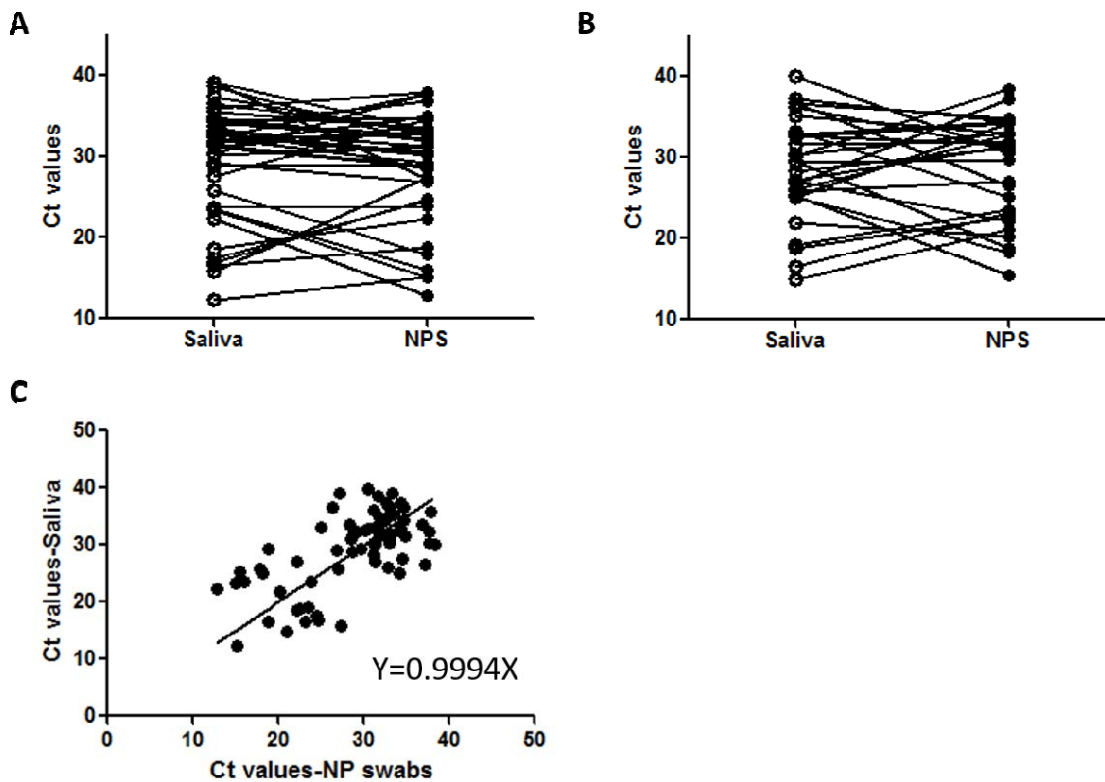

344

345

346 **Figure 2.**

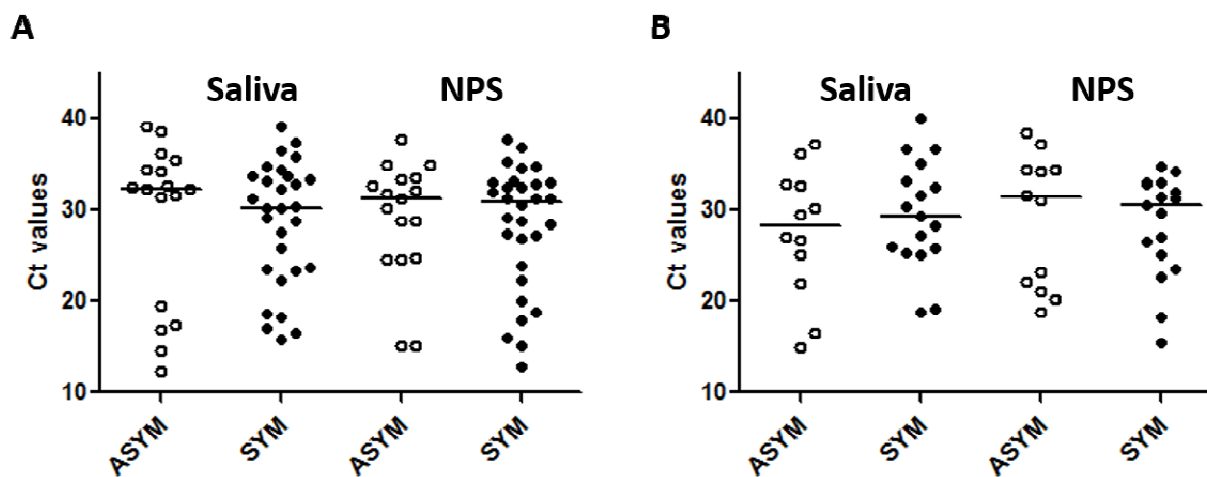

347

348

349



350 **Figure 3.**

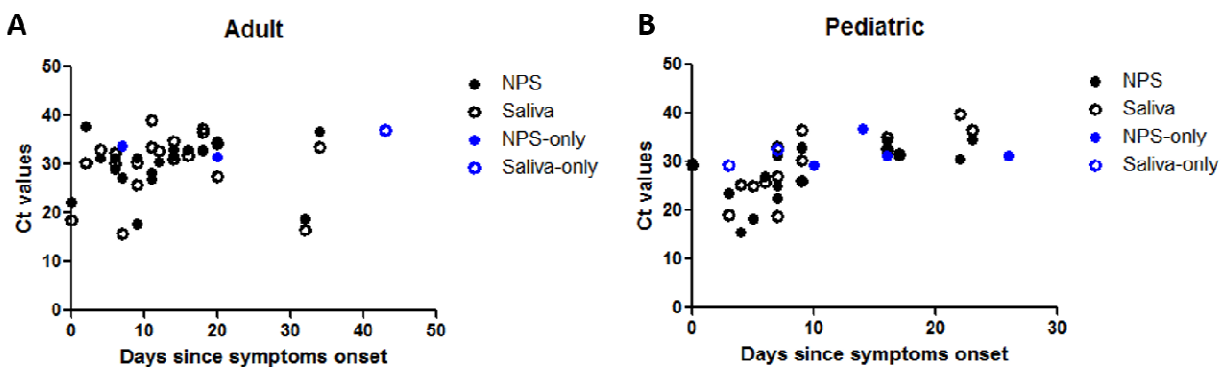

351

352
